# Supplementary material for: Cell Line-Based Human Bladder Organoids with Bladder-like Self-Organization—A New Standardized Approach in Bladder Cancer Research
Source: MDPI journal article supplement (doi:10.3390/biomedicines11112958), 2023-11-01
Supplement: s1 [file s1]

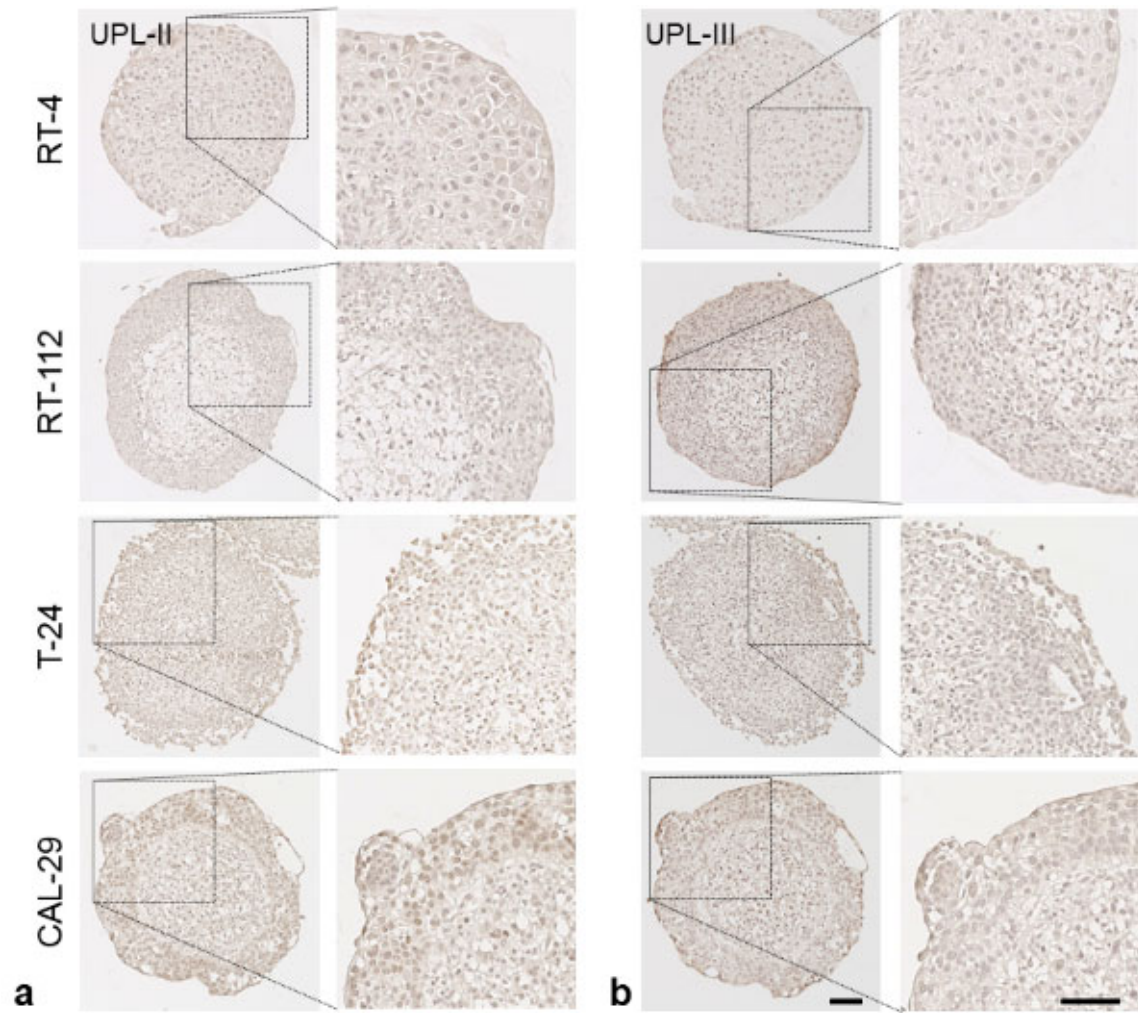

**Figure S3: Formation of uroplakin plaques in BCa organoids.** Analysis of uroplakin-II (UPL-II) and uroplakin-III (UPL-III) immunoreactivity in BCa cells. (a) Representative images of BCa Orgs immunostained for UPL-II (a, brown) and UPL-III (b, brown); cell nuclei (blue). Uroplakins were almost not existent. Scale bar: 100  $\mu$ m.
